# Supplementary material for: Attenuative Effects of Platelet-Rich Plasma on 30 kDa Fibronectin Fragment-Induced MMP-13 Expression Associated with TLR2 Signaling in Osteoarthritic Chondrocytes and Synovial Fibroblasts
Source: MDPI journal article supplement (doi:10.3390/jcm10194496), 2021-09-29
Supplement: s1 [file s1]

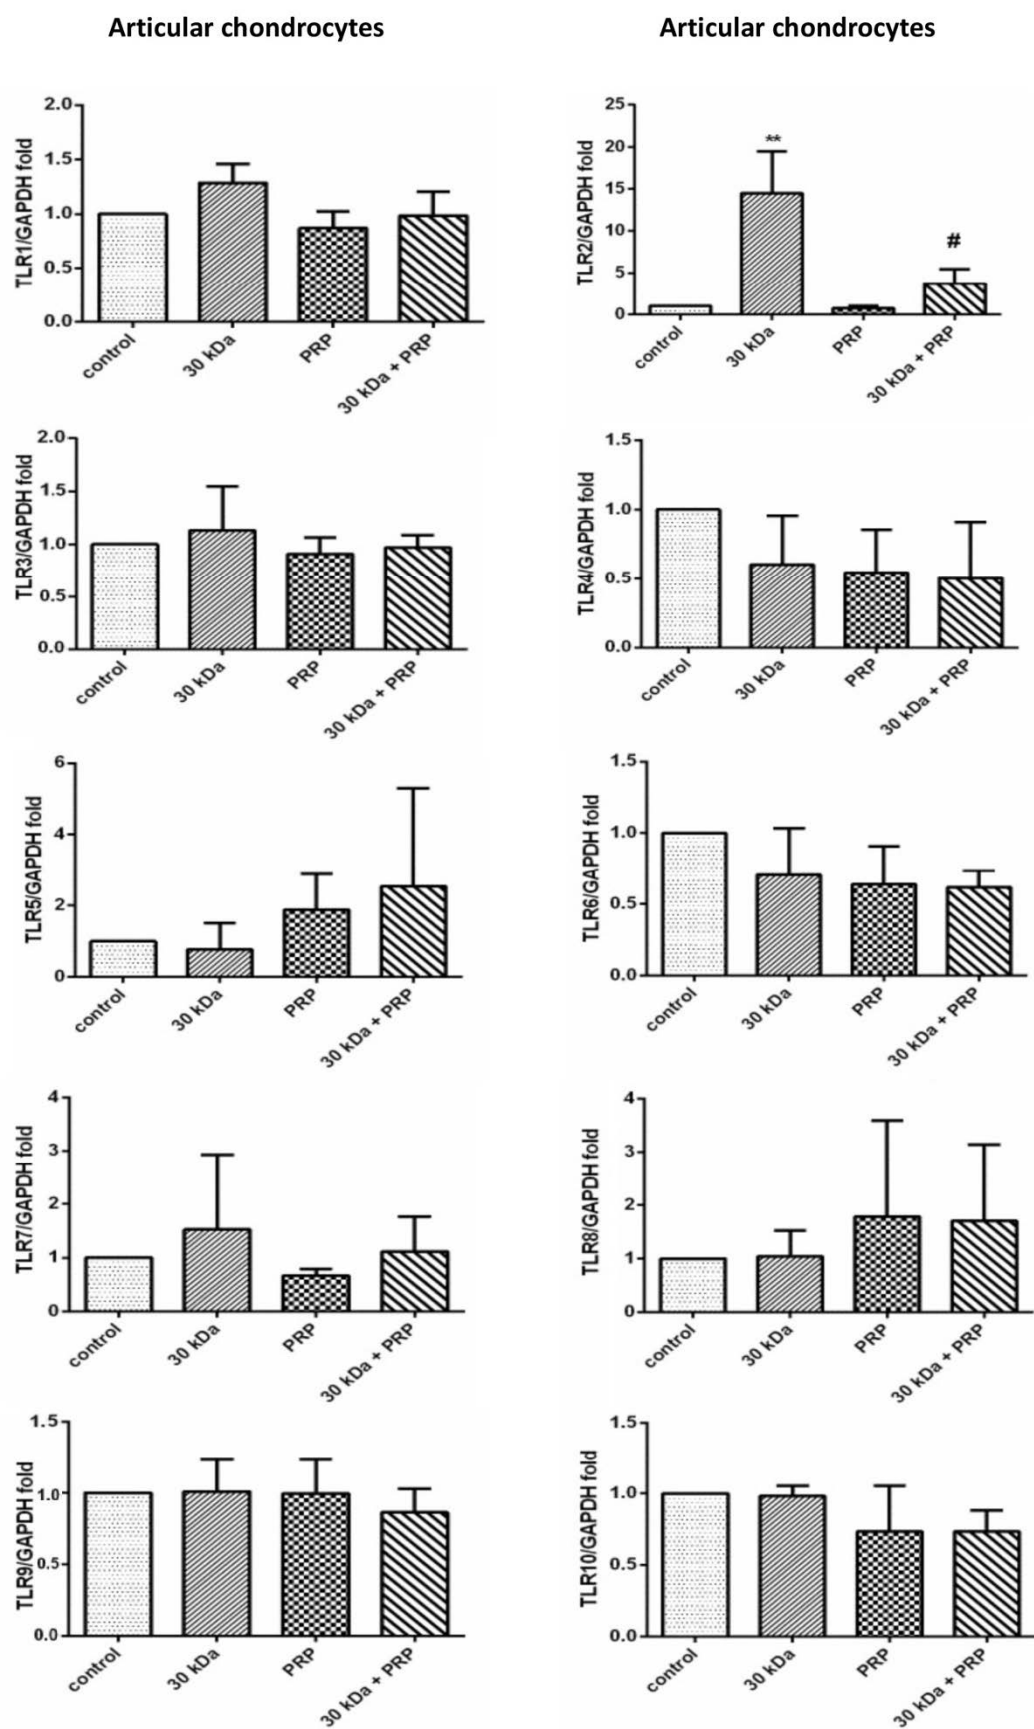

Figure S1. Gene expression of *TLR1-10* induced in articular chondrocytes via

**treatment with 30 kDa FN-f and PRP.** *TLR* gene expression levels detected using qPCR after incubation with 30 kDa FN-f and PRP for 24 hours. All data are presented as the mean  $\pm$  SD. Statistical differences among 30 kDa FN-f groups were compared with control values, whereas 30 kDa FN-f+PRP groups were compared with 30 kDa FN-f groups using the student's *t*-test (\*\* $p < 0.01$ , compared with control; # $p < 0.05$ , 30 kDa+PRP vs 30 kDa;  $n = 5$  for each group).
